# Supplementary material for: Bovine colostrum supplementation and upper respiratory symptoms during exercise training: a systematic review and meta-analysis of randomised controlled trials
Source: Springer Nature journal article supplement (doi:10.1186/s13102-016-0047-8), 2016-07-25
Supplement: MOESM1 [file 10521270]

## Additional file 1

**Bovine colostrum supplementation and upper respiratory tract symptoms during exercise training: a systematic review and meta-analysis of randomised controlled trials**

### Sample search strategy

---

|          | <b>Search term</b> |
|----------|--------------------|
| <b>1</b> | bovine colostrum   |
| <b>2</b> | bovine colostrums  |
| <b>3</b> | beastings          |
| <b>4</b> | 1 OR 2 OR 3        |

---
